# Supplementary material
Source: PubMed Central journal article supplement (PMC3710116)
Supplement: NIHMS29540-supplement-01.pdf [file NIHMS29540-supplement-01.pdf]

| PKR Derivative             | RNA                 | $K_D$ (nM) | $\Delta G$ (kcal/mol) | $\Delta H$ (kcal/mol) | $\Delta S$ (cal/mol*K) |
|----------------------------|---------------------|------------|-----------------------|-----------------------|------------------------|
| dsRBD1/2                   | VA <sub>1</sub>     | 76         | -9.9                  | -11.2                 | -4.4                   |
|                            | EBER <sub>1</sub>   | 76         | -9.9                  | -11.4                 | -5.1                   |
|                            | VA <sub>1</sub> -AS | 82         | -9.8                  | -10.9                 | -3.6                   |
| PKR                        | VA <sub>1</sub>     | 79         | -9.8                  | -11.3                 | -4.8                   |
|                            | EBER <sub>1</sub>   | 94         | -9.7                  | -11.9                 | -7.1                   |
|                            | VA <sub>1</sub> -AS | 77         | -9.9                  | -10.9                 | -3.4                   |
| PKR <sup>P</sup>           | VA <sub>1</sub>     | >2300      | -7.8                  | -8.5                  | -2.3                   |
|                            | EBER <sub>1</sub>   | >1800      | -8.0                  | -8.7                  | -2.4                   |
|                            | VA <sub>1</sub> -AS | >1700      | -8.0                  | -8.2                  | -0.7                   |
| PKR <sup>K296R</sup>       | VA <sub>1</sub>     | 91         | -9.8                  | -10.8                 | -3.4                   |
|                            | EBER <sub>1</sub>   | 79         | -9.8                  | -10.9                 | -3.5                   |
|                            | VA <sub>1</sub> -AS | 86         | -9.8                  | -11.3                 | -5.0                   |
| PKR <sup>252-551</sup>     | VA <sub>1</sub>     | >1400      | -8.1                  | -8.9                  | -2.6                   |
|                            | EBER <sub>1</sub>   | >1400      | -8.1                  | -9.0                  | -2.9                   |
|                            | VA <sub>1</sub> -AS | >1900      | -7.9                  | -8.5                  | -1.9                   |
| PKR <sup>170-551</sup>     | VA <sub>1</sub>     | >1300      | -8.2                  | -8.6                  | -1.5                   |
|                            | EBER <sub>1</sub>   | >1700      | -8.0                  | -7.9                  | -0.3                   |
|                            | VA <sub>1</sub> -AS | >1600      | -8.0                  | -8.6                  | -1.9                   |
| PKR <sup>T446A/T451A</sup> | VA <sub>1</sub>     | 87         | -9.8                  | -11.6                 | -1.5                   |
|                            | EBER <sub>1</sub>   | 85         | -9.8                  | -11.0                 | -4.0                   |
|                            | VA <sub>1</sub> -AS | 75         | -9.9                  | -11.3                 | -4.7                   |

**Supplemental Figure 1.** Summary of thermodynamic parameters determined by isothermal titration calorimetry at 30 °C. PKR derivative and RNA ligand are indicated.
